# Supplementary material
Source: HighWire-hosted journal article supplement (http://www.ajnr.org/highwire/filestream/71838/field_highwire_adjunct_files/0/19-00693.pdf)
Supplement: 19-00693.pdf [file 19-00693.pdf]

**On-line Table: Univariate Cox regression model of each histogram feature of DCE-MR imaging–derived pharmacokinetic parameters from baseline, posttreatment T2 high-signal-intensity lesion, and its percentage change**

| Histogram Feature of DCE-MR Imaging Parameters  | Mean    | SD       | Hazard Ratio (95% CI) <sup>a</sup> | P Value |
|-------------------------------------------------|---------|----------|------------------------------------|---------|
| <b>Baseline <math>K^{trans}</math></b>          |         |          |                                    |         |
| Mean                                            | 0.00652 | 0.00243  | 1.16 (0.987–1.36)                  | .072    |
| SD                                              | 0.00740 | 0.00476  | 1.07 (0.980–1.16)                  | .138    |
| Skewness                                        | 7.27    | 13.7     | 1.00 (1.00–1.00)                   | .256    |
| Kurtosis                                        | 286     | 1113     | 1.00 (1.00–1.00)                   | .165    |
| Fifth percentile                                | 0.00143 | 0.000914 | 1.26 (0.855–1.84)                  | .245    |
| First quartile <sup>b</sup>                     | 0.00259 | 0.00132  | 1.51 (1.08–2.12)                   | .016    |
| Median <sup>b</sup>                             | 0.00478 | 0.00188  | 1.26 (1.01–1.57)                   | .038    |
| Third quartile                                  | 0.00814 | 0.00321  | 1.12 (0.990–1.27)                  | .072    |
| 95th percentile                                 | 0.0174  | 0.00770  | 1.03 (0.977–1.08)                  | .291    |
| <b>Posttreatment <math>K^{trans}</math></b>     |         |          |                                    |         |
| Mean                                            | 0.00527 | 0.00254  | 1.13 (0.971–1.32)                  | .113    |
| SD                                              | 0.00443 | 0.00306  | 1.06 (0.944–1.19)                  | .323    |
| Skewness                                        | 2.36    | 1.19     | 1.00 (1.00–1.00)                   | .446    |
| Kurtosis                                        | 11.1    | 13.1     | 1.00 (1.00–1.00)                   | .282    |
| Fifth percentile                                | 0.00151 | 0.00144  | 1.16 (0.921–1.47)                  | .205    |
| First quartile                                  | 0.00245 | 0.00157  | 1.22 (0.977–1.53)                  | .078    |
| Median <sup>b</sup>                             | 0.00398 | 0.00218  | 1.22 (1.03–1.45)                   | .024    |
| Third quartile                                  | 0.00680 | 0.00338  | 1.08 (0.966–1.22)                  | .170    |
| 95th percentile                                 | 0.0131  | 0.00681  | 1.03 (0.973–1.09)                  | .302    |
| <b>Percentage change <math>K^{trans}</math></b> |         |          |                                    |         |
| Mean                                            | –14.2   | 37.7     | 1.00 (0.991–1.01)                  | .705    |
| SD                                              | –26.3   | 46.9     | 1.00 (0.994–1.01)                  | .581    |
| Skewness                                        | –25.7   | 55.5     | 1.00 (0.996–1.01)                  | .310    |
| Kurtosis                                        | –19.0   | 138      | 1.00 (1.00–1.01)                   | .066    |
| Fifth percentile                                | 32.9    | 99.5     | 1.00 (0.995–1.00)                  | .600    |
| First quartile                                  | 5.33    | 59.0     | 1.00 (0.992–1.00)                  | .776    |
| Median                                          | –12.0   | 41.3     | 1.01 (0.996–1.02)                  | .228    |
| Third quartile                                  | –10.5   | 40.7     | 1.00 (0.991–1.01)                  | .817    |
| 95th percentile                                 | –17.0   | 41.2     | 1.00 (0.993–1.01)                  | .602    |
| <b>Baseline <math>v_p</math></b>                |         |          |                                    |         |
| Mean                                            | 0.297   | 0.160    | 1.03 (0.0555–19.2)                 | .983    |
| SD                                              | 0.271   | 0.150    | 0.70 (0.0426–11.6)                 | .806    |
| Skewness                                        | 4.84    | 4.21     | 1.03 (0.950–1.12)                  | .460    |
| Kurtosis                                        | 87.0    | 195      | 1.00 (0.999–1.00)                  | .561    |
| Fifth percentile                                | 0.0635  | 0.0364   | 0.27 (0.000–119,230)               | .845    |
| First quartile                                  | 0.138   | 0.0700   | 2.16 (0.00325–1440)                | .816    |
| Median                                          | 0.227   | 0.124    | 1.60 (0.0301–84.6)                 | .817    |
| Third quartile                                  | 0.365   | 0.210    | 1.46 (0.147–14.5)                  | .746    |
| 95th percentile                                 | 0.765   | 0.437    | 0.90 (0.337–2.42)                  | .839    |
| <b>Posttreatment <math>v_p</math></b>           |         |          |                                    |         |
| Mean                                            | 0.237   | 0.168    | 1.49 (0.124–17.9)                  | .753    |
| SD                                              | 0.176   | 0.162    | 1.14 (0.0828–15.7)                 | .921    |
| Skewness                                        | 2.62    | 1.36     | 1.05 (0.786–1.41)                  | .733    |
| Kurtosis                                        | 17.1    | 19.4     | 1.01 (0.986–1.03)                  | .575    |
| Fifth percentile                                | 0.0588  | 0.0411   | 112 (0.00684–1,832,379)            | .341    |
| First quartile                                  | 0.126   | 0.0842   | 3.91 (0.0308–496)                  | .581    |
| Median                                          | 0.194   | 0.130    | 2.71 (0.110–66.2)                  | .542    |
| Third quartile                                  | 0.292   | 0.201    | 1.51 (0.187–12.1)                  | .700    |
| 95th percentile                                 | 0.538   | 0.412    | 1.00 (0.349–2.85)                  | .994    |
| <b>Percentage change <math>v_p</math></b>       |         |          |                                    |         |
| Mean                                            | –4.84   | 93.0     | 1.00 (0.997–1.01)                  | .516    |
| SD                                              | –21.9   | 79.0     | 1.00 (0.995–1.01)                  | .865    |
| Skewness                                        | –20.9   | 60.0     | 1.00 (0.993–1.01)                  | .977    |
| Kurtosis                                        | 13.0    | 183      | 1.00 (0.999–1.00)                  | .597    |
| Fifth percentile                                | 25.7    | 181      | 1.00 (0.999–1.00)                  | .243    |
| First quartile                                  | 11.6    | 137      | 1.00 (0.998–1.00)                  | .466    |
| Median                                          | 2.61    | 101      | 1.00 (0.998–1.01)                  | .364    |
| Third quartile                                  | –4.23   | 88.5     | 1.00 (0.997–1.01)                  | .529    |
| 95th percentile                                 | –13.2   | 83.6     | 1.00 (0.996–1.01)                  | .703    |
| <b>Baseline <math>v_e</math></b>                |         |          |                                    |         |
| Mean                                            | 1.29    | 0.620    | 1.05 (0.571–1.92)                  | .882    |
| SD                                              | 7.64    | 4.83     | 0.96 (0.885–1.05)                  | .383    |
| Skewness                                        | 40.3    | 15.8     | 0.99 (0.970–1.02)                  | .603    |

Continued on next page

**On-line Table: Continued**

| Histogram Feature of DCE-MR Imaging Parameters | Mean  | SD     | Hazard Ratio (95% CI) <sup>a</sup> | P Value |
|------------------------------------------------|-------|--------|------------------------------------|---------|
| Kurtosis                                       | 2153  | 1492   | 1.00 (1.00–1.00)                   | .634    |
| Fifth percentile                               | 0.200 | 0.0707 | 5.11 (0.0200–1329)                 | .565    |
| First quartile                                 | 0.412 | 0.156  | 3.54 (0.418–29.9)                  | .246    |
| Median                                         | 0.658 | 0.277  | 1.91 (0.552–6.59)                  | .308    |
| Third quartile                                 | 1.12  | 0.480  | 1.54 (0.742–3.19)                  | .247    |
| 95th percentile                                | 2.85  | 1.47   | 1.02 (0.787–1.32)                  | .880    |
| Posttreatment $v_e$                            |       |        |                                    |         |
| Mean                                           | 1.75  | 1.84   | 0.96 (0.796–1.15)                  | .629    |
| SD                                             | 8.51  | 10.7   | 0.99 (0.950–1.02)                  | .395    |
| Skewness                                       | 20.0  | 12.1   | 0.98 (0.946–1.01)                  | .203    |
| Kurtosis                                       | 642   | 685    | 1.00 (0.999–1.00)                  | .342    |
| Fifth percentile                               | 0.167 | 0.0854 | 4.69 (0.098–224)                   | .433    |
| First quartile                                 | 0.345 | 0.152  | 1.60 (0.161–15.8)                  | .689    |
| Median                                         | 0.591 | 0.305  | 1.19 (0.405–3.49)                  | .753    |
| Third quartile                                 | 1.15  | 0.991  | 0.99 (0.705–1.38)                  | .940    |
| 95th percentile                                | 4.87  | 5.35   | 0.99 (0.926–1.05)                  | .695    |
| Percentage change $v_e$                        |       |        |                                    |         |
| Mean                                           | 56.5  | 193    | 1.00 (0.998–1.00)                  | .506    |
| SD                                             | 99.9  | 446    | 1.00 (0.999–1.00)                  | .673    |
| Skewness                                       | –37.6 | 59.4   | 1.00 (0.992–1.01)                  | .900    |
| Kurtosis                                       | –41.9 | 112    | 1.00 (0.997–1.00)                  | .891    |
| Fifth percentile                               | –8.84 | 49.5   | 1.00 (0.995–1.01)                  | .558    |
| First quartile                                 | –8.19 | 43.0   | 1.00 (0.987–1.01)                  | .388    |
| Median                                         | 1.53  | 58.2   | 1.00 (0.991–1.00)                  | .507    |
| Third quartile                                 | 12.6  | 85.2   | 1.00 (0.994–1.00)                  | .412    |
| 95 <sup>th</sup> percentile                    | 85.9  | 202    | 1.00 (0.998–1.00)                  | .574    |

<sup>a</sup> Hazard ratios for  $k^{trans}$  are adjusted for a unit change of  $0.001 \text{ min}^{-1}$ .

<sup>b</sup>  $P < .05$ .

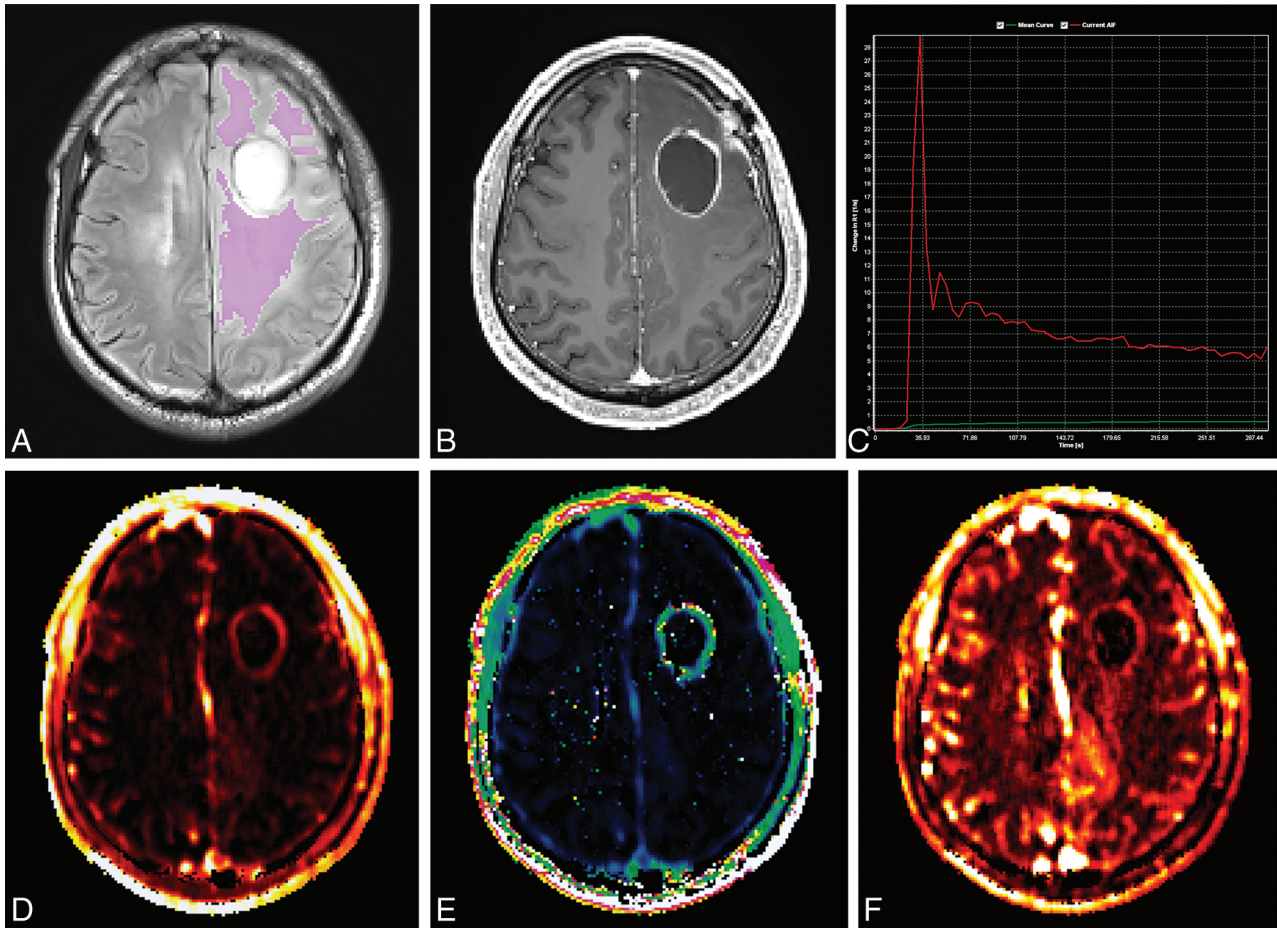

**ON-LINE FIGURE.** Dynamic contrast-enhanced image analysis process. Investigators carefully draw the VOI on every section of the FLAIR image (A), with reference to the contrast-enhanced T1-weighted image (B) to avoid minimal enhancement along the surgical margin. The investigators review the semiautomatically determined arterial input function (C). The pharmacokinetic parametric maps are calculated, including  $K^{trans}$ ,  $v_e$ , and  $v_p$  (D, E, and F, respectively). Each pharmacokinetic parameter in every voxel in the VOI is extracted, and histogram features are calculated for further analysis.
